# Supplementary material
Source: PubMed Central journal article supplement (PMC7880584)
Supplement: NIHMS1666674-supplement-Supporting_Information.pdf [file NIHMS1666674-supplement-Supporting_Information.pdf]

**Supporting Information for “Refining all-atom protein force fields for polar-rich, prion-like, low complexity intrinsically disordered proteins”**

Wai Shing Tang,<sup>†</sup> Nicolas L. Fawzi,<sup>¶</sup> and Jeetain Mittal<sup>‡,\*</sup>

<sup>†</sup>*Department of Physics, Brown University, Providence, RI 02912, USA*

<sup>¶</sup>*Department of Molecular Pharmacology, Physiology and Biotechnology, Brown University, Providence, RI 02912, USA*

<sup>‡</sup>*Department of Chemical and Biomolecular Engineering, Lehigh University, Bethlehem, PA 18015, USA*

\*E-mail: jem309@lehigh.edu

## Tables

Table S1: Protein sequences used in simulations

| Protein                         | N  | Sequence                                                       |
|---------------------------------|----|----------------------------------------------------------------|
| FUS <sub>0-43</sub> *           | 44 | GMASNDYTQQATQSYGAYPTQPGQGYSSQSSQPYGQQSYSGYSQ                   |
| TDP43 <sub>310-350</sub>        | 41 | GMNFGAFSINPAMMAAQAALQSSWGMMGLASQQNQSGPS                        |
| RNA Pol II <sub>1927-1970</sub> | 44 | SPTYSPKSTSPKSTYSPTSPGYSPSTPQYSLTSPAPISPDSSDEEN                 |
| FUS <sub>41-84</sub>            | 44 | YSQSTDTSQYGQSSYSSYQSQNTGYGTQSTPQGYGSTGGYGSS                    |
| FUS <sub>77-120</sub>           | 44 | STGGYGSSQSSQSSYQSSYQSSYQGYQSPAPSSTSGSYGSSSQSS                  |
| FUS <sub>120-163</sub>          | 44 | SSYGQPQSGYSQSPSYGGQQSYGQQQSYNPPQGYGQQNQYNS                     |
| FUS <sub>37-97</sub>            | 61 | SYSGYSQSTDTSQYGQSSYSSYQSQNTGYGTQSTPQGYGSTGGYGSSQSSQSSYQSSYQSSY |
| hnRNPA2 <sub>190-233</sub>      | 44 | GRGGNFGFGDSRGGGNGFPGPGSNFRGGSDGYGSGRFGDGYN                     |
| hnRNPA2 <sub>265-308</sub>      | 44 | GNQGGGYYGGYDNYGGGNYGSGNYNDFGNYNQQPSNYGPMKSGN                   |

\*a starting glycine is included in FUS<sub>0-43</sub> as residue 0

Table S2: Summary of simulations performed using ff99SBws, where N is the number of residues in given protein or peptide.

| Protein                         | N  | Enhanced Sampling | Total simulation time (ns/replica) | Simulation time analyzed (ns/replica) |
|---------------------------------|----|-------------------|------------------------------------|---------------------------------------|
| TDP43 <sub>310-350</sub>        | 41 | PT-WTE            | 200                                | 150                                   |
| FUS <sub>0-43</sub>             | 44 | PT-WTE            | 200                                | 150                                   |
| FUS <sub>41-84</sub>            | 44 | PT-WTE            | 200                                | 150                                   |
| FUS <sub>77-120</sub>           | 44 | PT-WTE            | 200                                | 150                                   |
| FUS <sub>120-163</sub>          | 44 | PT-WTE            | 200                                | 150                                   |
| FUS <sub>37-97</sub>            | 61 | PT-WTE            | 200                                | 150                                   |
| hnRNPA2 <sub>190-234</sub>      | 44 | PT-WTE            | 200                                | 150                                   |
| hnRNPA2 <sub>256-308</sub>      | 44 | PT-WTE            | 200                                | 150                                   |
| RNA Pol II <sub>1927-1970</sub> | 44 | PT-WTE            | 200                                | 150                                   |

Table S3: Summary of simulations performed using ff03ws, where N is the number of residues in given protein or peptide.

| Protein                         | N  | Enhanced Sampling | Total simulation time*<br>(ns/replica) | Simulation time analyzed*<br>(ns/replica) |
|---------------------------------|----|-------------------|----------------------------------------|-------------------------------------------|
| TDP43 <sub>310-350</sub>        | 41 | PT-WTE            | 200                                    | 150                                       |
| FUS <sub>0-43</sub>             | 44 | PT-WTE            | 200                                    | 150                                       |
| FUS <sub>41-84</sub>            | 44 | PT-WTE            | 200                                    | 150                                       |
| FUS <sub>77-120</sub>           | 44 | PT-WTE            | 200                                    | 150                                       |
| FUS <sub>120-163</sub>          | 44 | PT-WTE            | 200                                    | 150                                       |
| hnRNPA2 <sub>190-234</sub>      | 44 | PT-WTE            | 200                                    | 150                                       |
| hnRNPA2 <sub>256-308</sub>      | 44 | PT-WTE            | 200                                    | 150                                       |
| RNA Pol II <sub>1927-1970</sub> | 44 | PT-WTE            | 200                                    | 150                                       |

Table S4: Summary of simulations performed using modified force fields. All simulations were performed for a total of 200 ns per replica, and analysis conducted on the last 150 ns.

|              | $k_{\psi}$<br>(kJ/mol) | $k_{\psi,S}$<br>(kJ/mol) | $k_{\psi,T}$<br>(kJ/mol) | $k_{\psi,Q}$<br>(kJ/mol) | Simulated peptides                                                                |
|--------------|------------------------|--------------------------|--------------------------|--------------------------|-----------------------------------------------------------------------------------|
| ff99SBws     | 2.00                   | 2.00                     | 2.00                     | 2.00                     | FUS <sub>0-43</sub> , TDP-43 <sub>310-350</sub> , RNA Pol II <sub>1927-1970</sub> |
| ff99SBws-S   | 2.00                   | 1.00                     | 2.00                     | 2.00                     | FUS <sub>0-43</sub>                                                               |
| ff99SBws-T   | 2.00                   | 2.00                     | 1.00                     | 2.00                     | FUS <sub>0-43</sub>                                                               |
| ff99SBws-ST  | 2.00                   | 1.00                     | 1.00                     | 2.00                     | FUS <sub>0-43</sub> , TDP-43 <sub>310-350</sub> , RNA Pol II <sub>1927-1970</sub> |
| ff99SBws-TQ  | 2.00                   | 2.00                     | 1.00                     | 1.00                     | FUS <sub>0-43</sub> , TDP-43 <sub>310-350</sub> , RNA Pol II <sub>1927-1970</sub> |
| ff99SBws-STQ | 2.00                   | 1.00                     | 1.00                     | 1.00                     | FUS <sub>0-43</sub> , TDP-43 <sub>310-350</sub> , RNA Pol II <sub>1927-1970</sub> |

Table S5: Root-mean-squared deviation (RMSD) of simulated  $\Delta\delta C_\alpha$ ,  $\Delta\delta C_\beta$ ,  $\Delta\delta C_\alpha - \Delta\delta C_\beta$  (in ppm) from NMR  $^{13}\text{C}$  chemical shifts of three IDPs for ff99SBws, modified ff99SBws variants (S,T,ST,TQ,STQ) (this study), and ff99SB-disp.

| $\Delta\delta C_\alpha - \Delta\delta C_\beta$ | FUS <sub>0-43</sub> | TDP-43 <sub>310-350</sub> | RNA Pol II <sub>1927-1970</sub> |
|------------------------------------------------|---------------------|---------------------------|---------------------------------|
| ff99SBws                                       | 0.90 ± 0.11         | 0.64 ± 0.09               | 0.68 ± 0.11                     |
| ff99SB-disp                                    | 0.90 ± 0.11         | 0.78 ± 0.07               | 0.74 ± 0.11                     |
| ff99SBws-S                                     | 0.86 ± 0.10         |                           |                                 |
| ff99SBws-T                                     | 0.98 ± 0.13         |                           |                                 |
| ff99SBws-ST                                    | 0.64 ± 0.07         | 0.71 ± 0.08               | 0.74 ± 0.08                     |
| ff99SBws-TQ                                    | 0.62 ± 0.08         | 0.66 ± 0.06               | 0.71 ± 0.10                     |
| ff99SBws-STQ                                   | 0.54 ± 0.07         | 0.51 ± 0.04               | 0.74 ± 0.08                     |

  

| $\Delta\delta C_\alpha$ | FUS <sub>0-43</sub> | TDP-43 <sub>310-350</sub> | RNA Pol II <sub>1927-1970</sub> |
|-------------------------|---------------------|---------------------------|---------------------------------|
| ff99SBws                | 0.58 ± 0.07         | 0.43 ± 0.06               | 0.67 ± 0.11                     |
| ff99SB-disp             | 0.59 ± 0.07         | 0.54 ± 0.05               | 0.62 ± 0.09                     |
| ff99SBws-S              | 0.51 ± 0.06         |                           |                                 |
| ff99SBws-T              | 0.61 ± 0.08         |                           |                                 |
| ff99SBws-ST             | 0.41 ± 0.04         | 0.41 ± 0.04               | 0.62 ± 0.08                     |
| ff99SBws-TQ             | 0.36 ± 0.05         | 0.40 ± 0.04               | 0.64 ± 0.09                     |
| ff99SBws-STQ            | 0.37 ± 0.04         | 0.36 ± 0.03               | 0.62 ± 0.08                     |

  

| $\Delta\delta C_\beta$ | FUS <sub>0-43</sub> | TDP-43 <sub>310-350</sub> | RNA Pol II <sub>1927-1970</sub> |
|------------------------|---------------------|---------------------------|---------------------------------|
| ff99SBws               | 0.43 ± 0.05         | 0.42 ± 0.05               | 0.51 ± 0.06                     |
| ff99SB-disp            | 0.39 ± 0.05         | 0.39 ± 0.06               | 0.44 ± 0.11                     |
| ff99SBws-S             | 0.45 ± 0.06         |                           |                                 |
| ff99SBws-T             | 0.44 ± 0.05         |                           |                                 |
| ff99SBws-ST            | 0.37 ± 0.04         | 0.44 ± 0.05               | 0.47 ± 0.10                     |
| ff99SBws-TQ            | 0.40 ± 0.05         | 0.41 ± 0.06               | 0.42 ± 0.11                     |
| ff99SBws-STQ           | 0.34 ± 0.04         | 0.34 ± 0.06               | 0.47 ± 0.10                     |

## Protein sequences used in NMR experiments

### FUS Low Complexity domain FUS<sub>1-163</sub> (BMRB 26672)<sup>1</sup>

MASNDYTQQATQSYGAYPTQ PGQGYSSQSSQPYGQQSYSG YSQSTDTSGYGQSSYSSYGQ  
SQNTGYGTQSTPQGYGSTGG YGSSQSSQSSYGQQSSYPGY GQQPAPSSTSGSYGSSSQSS  
SYGQPQSGSYSQQPSYGGQQ QSYGQQQSYNPPQGYGQQNQ YNS  
(163 residues)

### TDP-43 Wild Type Low Complexity C-terminal domain TDP43<sub>267-414</sub> (BMRB 26823)<sup>2</sup>

*GHMNRQLERSGRFGGNPGGF* GNQGGFGNSRGGGAGLGNNQ GSNMGGGMNFGAFSINPAMM  
AAAQAALQSSWGMMGLASQ QNQSGPSGNNQNGNMQREP NQAFGSGNNSYSGNSGAAI  
GWGSASNAGSGSGFNNGFGS SMDSKSSGWGM  
(151 residues)

### RNA Pol II C-terminal Domain 27-52 RNA Pol II<sub>1770-1970</sub> (BMRB 27063)<sup>3</sup>

*GHMSPNYTPTSPNYSPTSPS* YSPTSPSYSPTSPSYSPSS RYTPQSPTYTPSSPSYSPSS  
PSYSPASPKYTPTSPSYSPS SPEYTPTSPKYSPTSPKYS TSPKYSPTSPYSPTPKYS  
PTSPTYSPVYTPTSPKY SPTSPTYSPKYSPTSPT YSPTSPKYSTYSPTSPGYSP  
TSPTYSLTSPAISPDDSDEE N  
(201 residues)

### hnRNPA2 low complexity domain 190-341 hnRNPA2<sub>190-341</sub> (BMRB 27123)<sup>4</sup>

*GHMGRGGNFGFGDSRGGGN* FGPGPSNFRGGSDGYGSGR FFGDGYNGYGGGPGGNFGG  
SPGYGGGRGGYGGGGPGYGN QGGYGGYDNYGGGNYGSG NYNDFGNYNQQPSNYGPMKS  
GNFGGSRNMGGPYGGGNYGP GSGGGSGGYGGRSRY  
(155 residues)

The residues in *italics* correspond to TEV-cleavage and cloning “scar” residues not present in the native sequences.

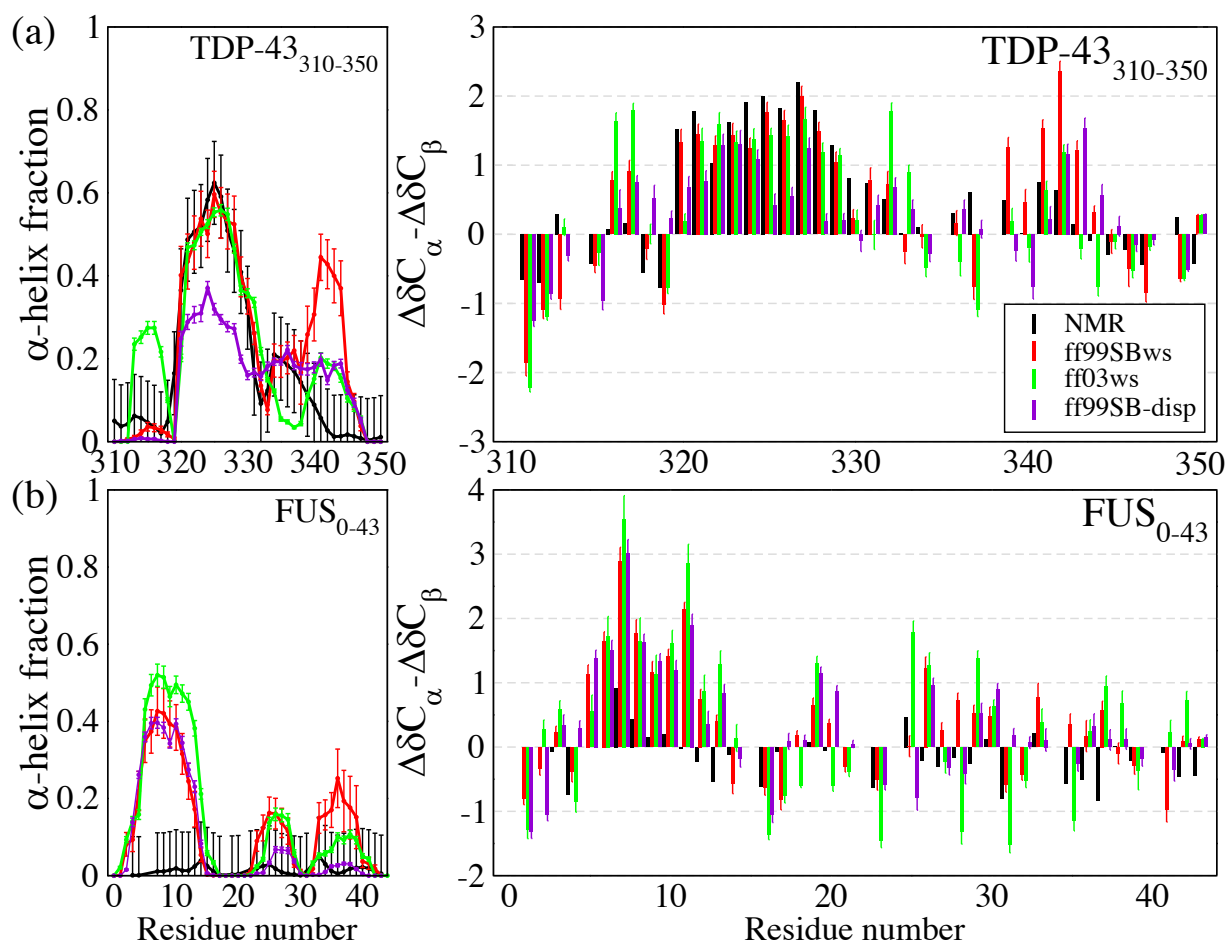

**Figure S1.** (a)  $\alpha$ -helix propensities and (b) Chemical shifts  $\Delta\delta C_{\alpha} - \Delta\delta C_{\beta}$  of TDP-43<sub>310-350</sub> and FUS<sub>0-43</sub> using all-atom force fields ff99SBws, ff03ws, and ff99SB-disp, compared to experimental results. Chemical shifts are calculated from protein structure using SPARTA+ algorithm. Secondary structures are assigned by DSSP. Experimental values of secondary structure propensities are calculated from NMR chemical shifts using the  $\delta$ 2D program.

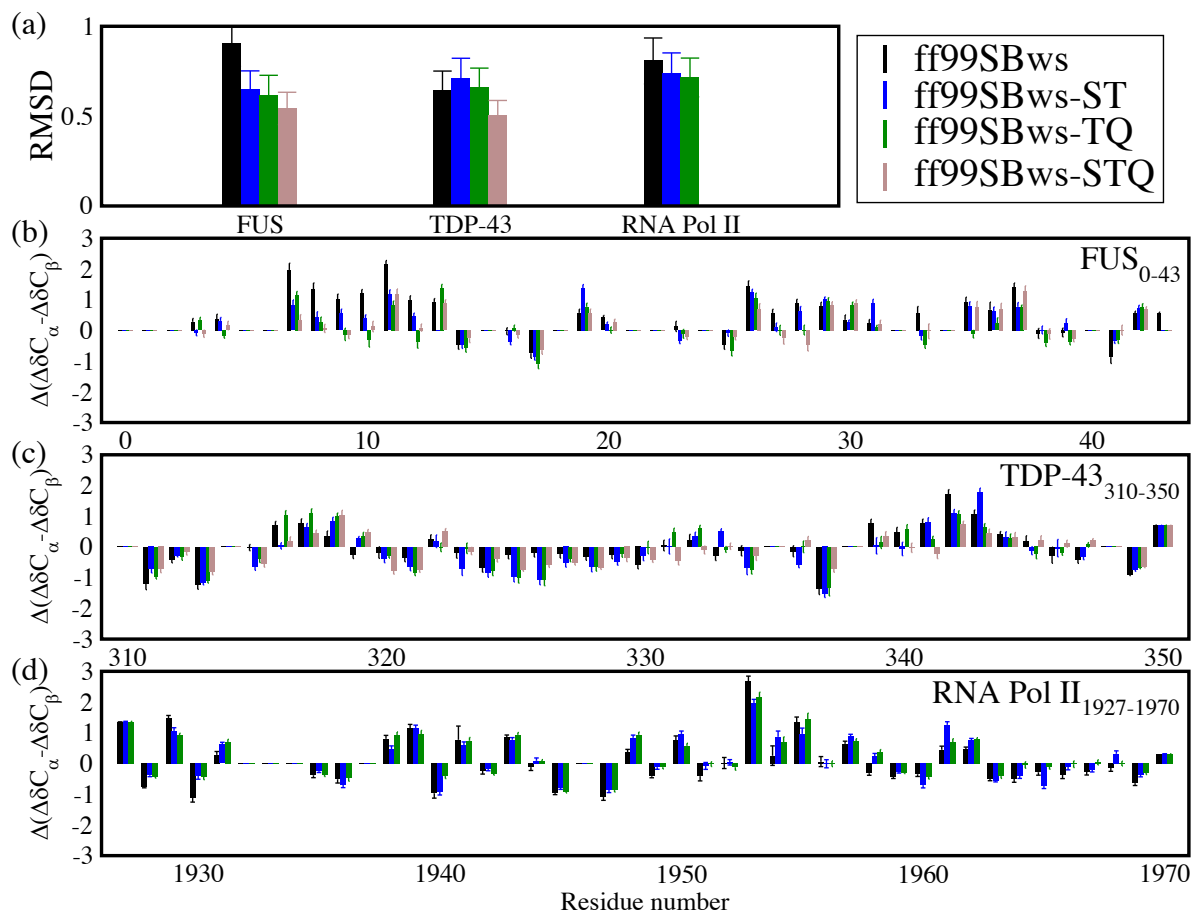

**Figure S2.** (a) Comparison of Root-mean-squared deviation (RMSD) of simulated  $\delta C_{\alpha} - \delta C_{\beta}$  (in ppm) from NMR  $^{13}\text{C}$  chemical shifts (RMSD) of simulated sequences and (b-d) chemical shift deviation from the experiment  $\Delta(\Delta\delta C_{\alpha} - \Delta\delta C_{\beta})$  with ff99SBws and modified force fields (see legend).

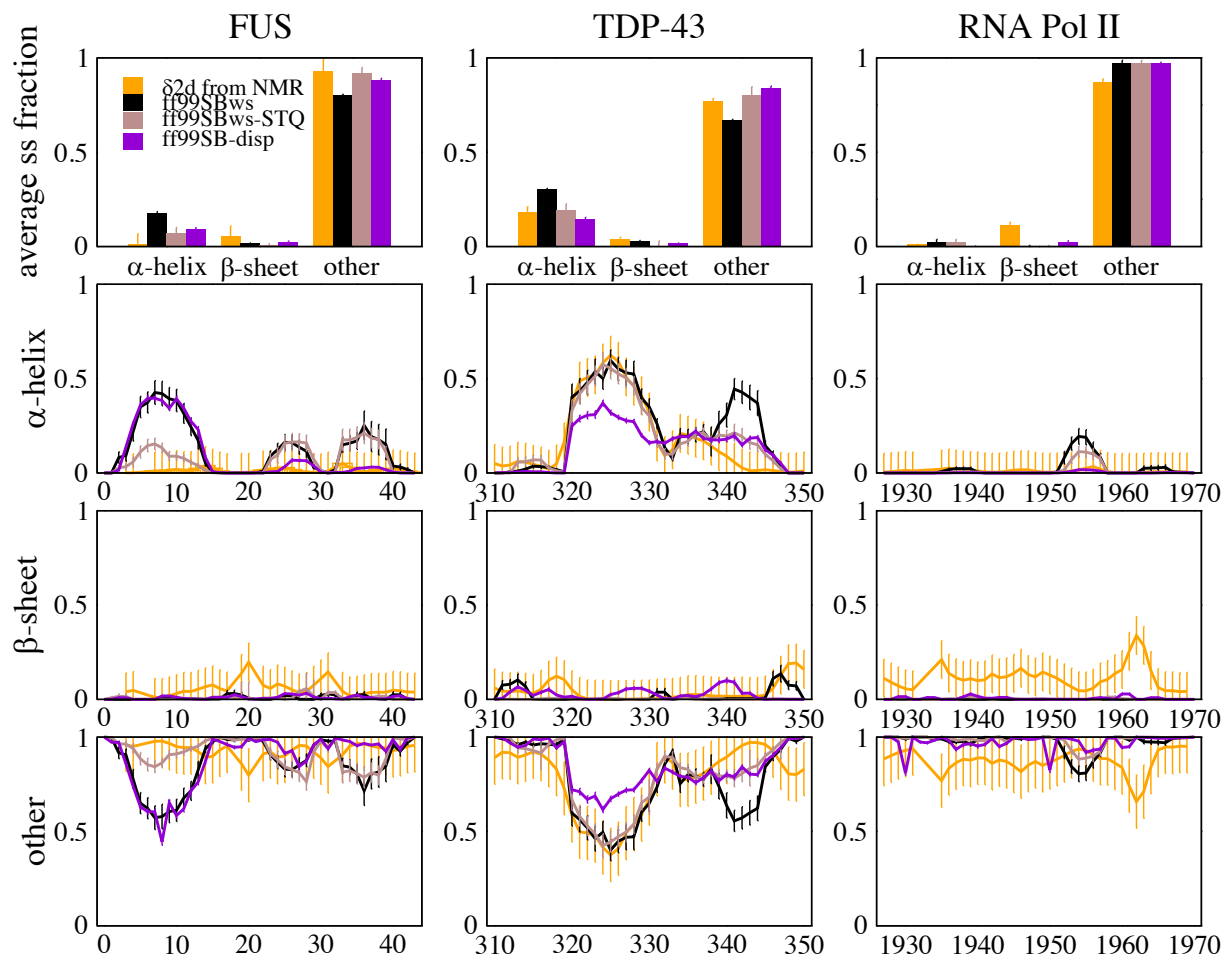

**Figure S3.** Secondary structure propensities of FUS<sub>0-43</sub>, TDP-43<sub>310-350</sub>, and RNA Pol II<sub>1927-1970</sub> with ff99SBws, ff99SBws-STQ (this study) and ff99SB-disp, compared to  $\delta$ 2D secondary structure propensities calculated from experimental NMR chemical shifts.



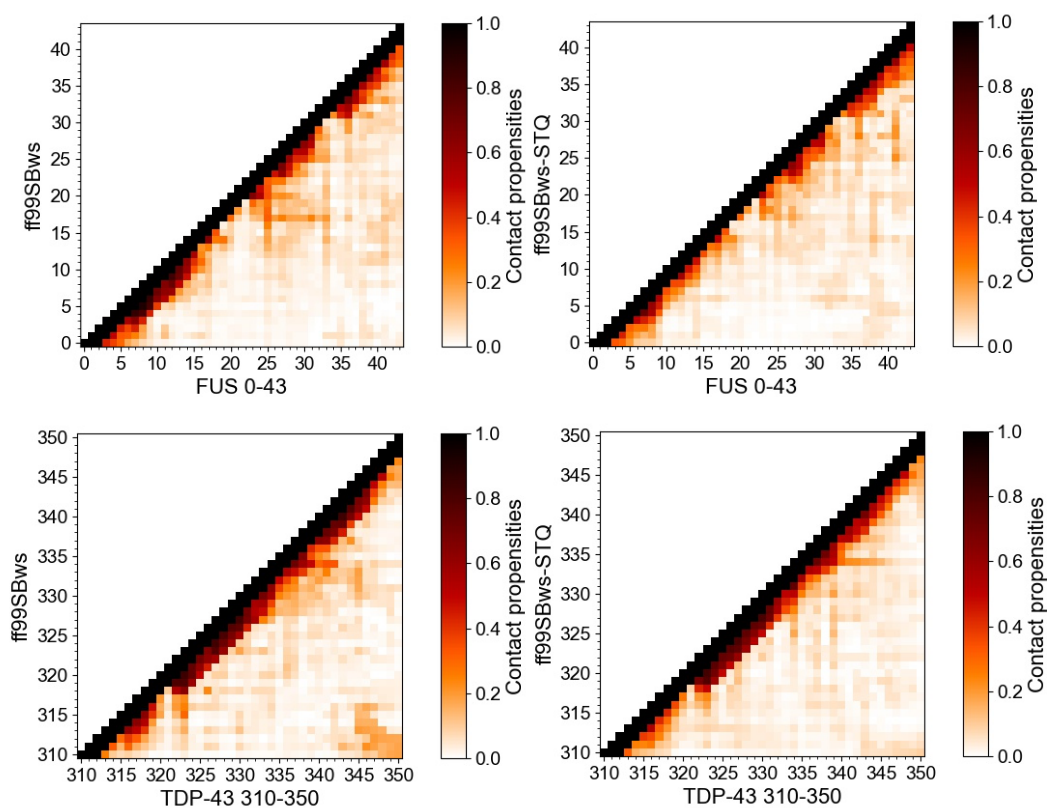

**Figure S4.** Intrachain residue-to-residue contact propensities in FUS<sub>0-43</sub> and TDP-43<sub>310-350</sub> with ff99SBws and ff99SBws-STQ (this study). Two residues are considered in contact when any heavy atoms from each of the residue are within 6 Angstrom in simulation. Contact propensities are the proportion of frames in simulation where two residues are in contact, with contact propensity = 1 being always in contact.

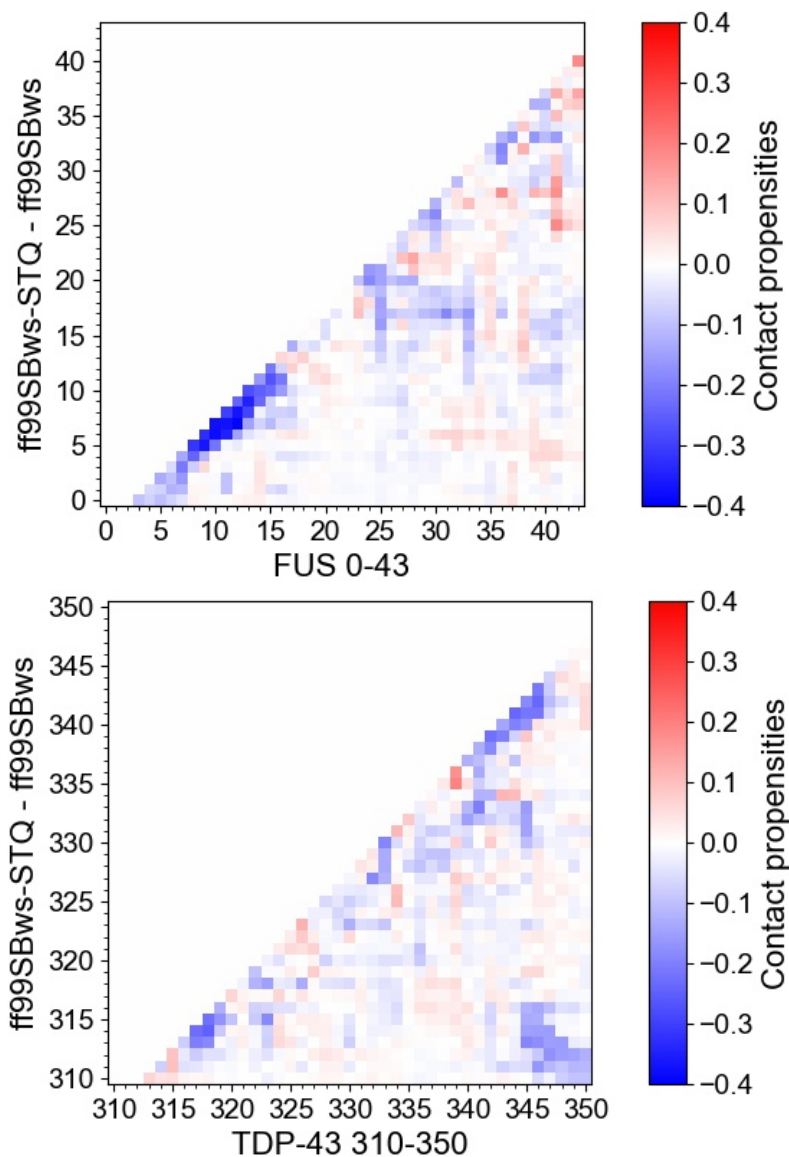

**Figure S5.** Change in Intrachain residue-to-residue contact propensities in FUS<sub>0-43</sub> and TDP-43<sub>310-350</sub> from ff99SBws to ff99SBws-STQ (this study) Two residues are considered in contact when any heavy atoms from each of the residue are within 6 Angstrom in simulation. Contact propensities are the proportion of frames in simulation where two residues are in contact, with contact propensity = 1 being always in contact.

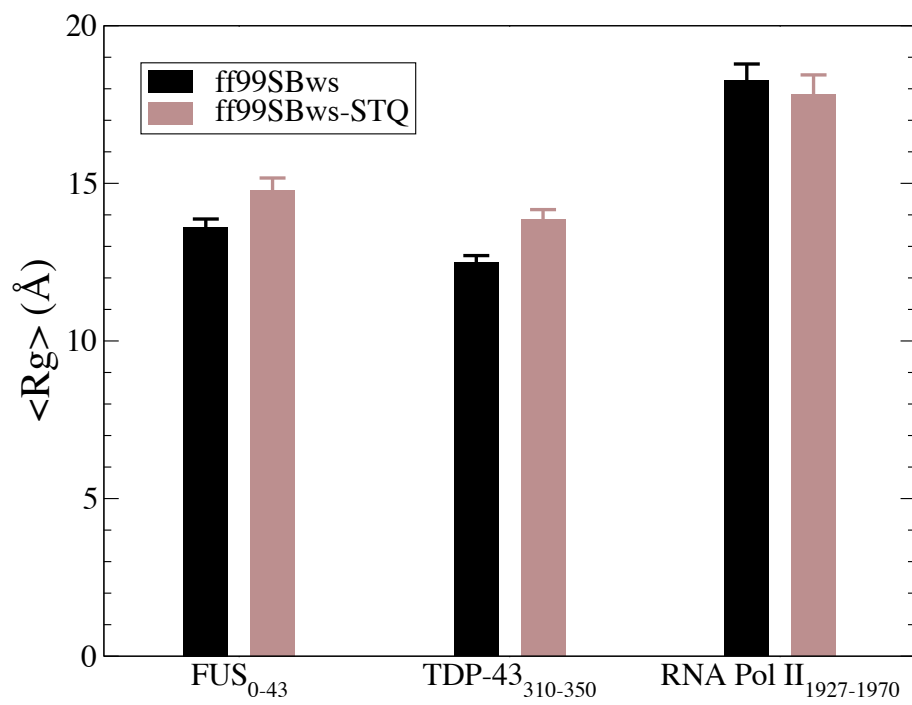

**Figure S6.** Average radius of gyration ( $R_g$ ) in FUS<sub>0-43</sub>, TDP-43<sub>310-350</sub> and RNA Pol II<sub>1927-1970</sub> with ff99SBws and ff99SBws-STQ (this study).

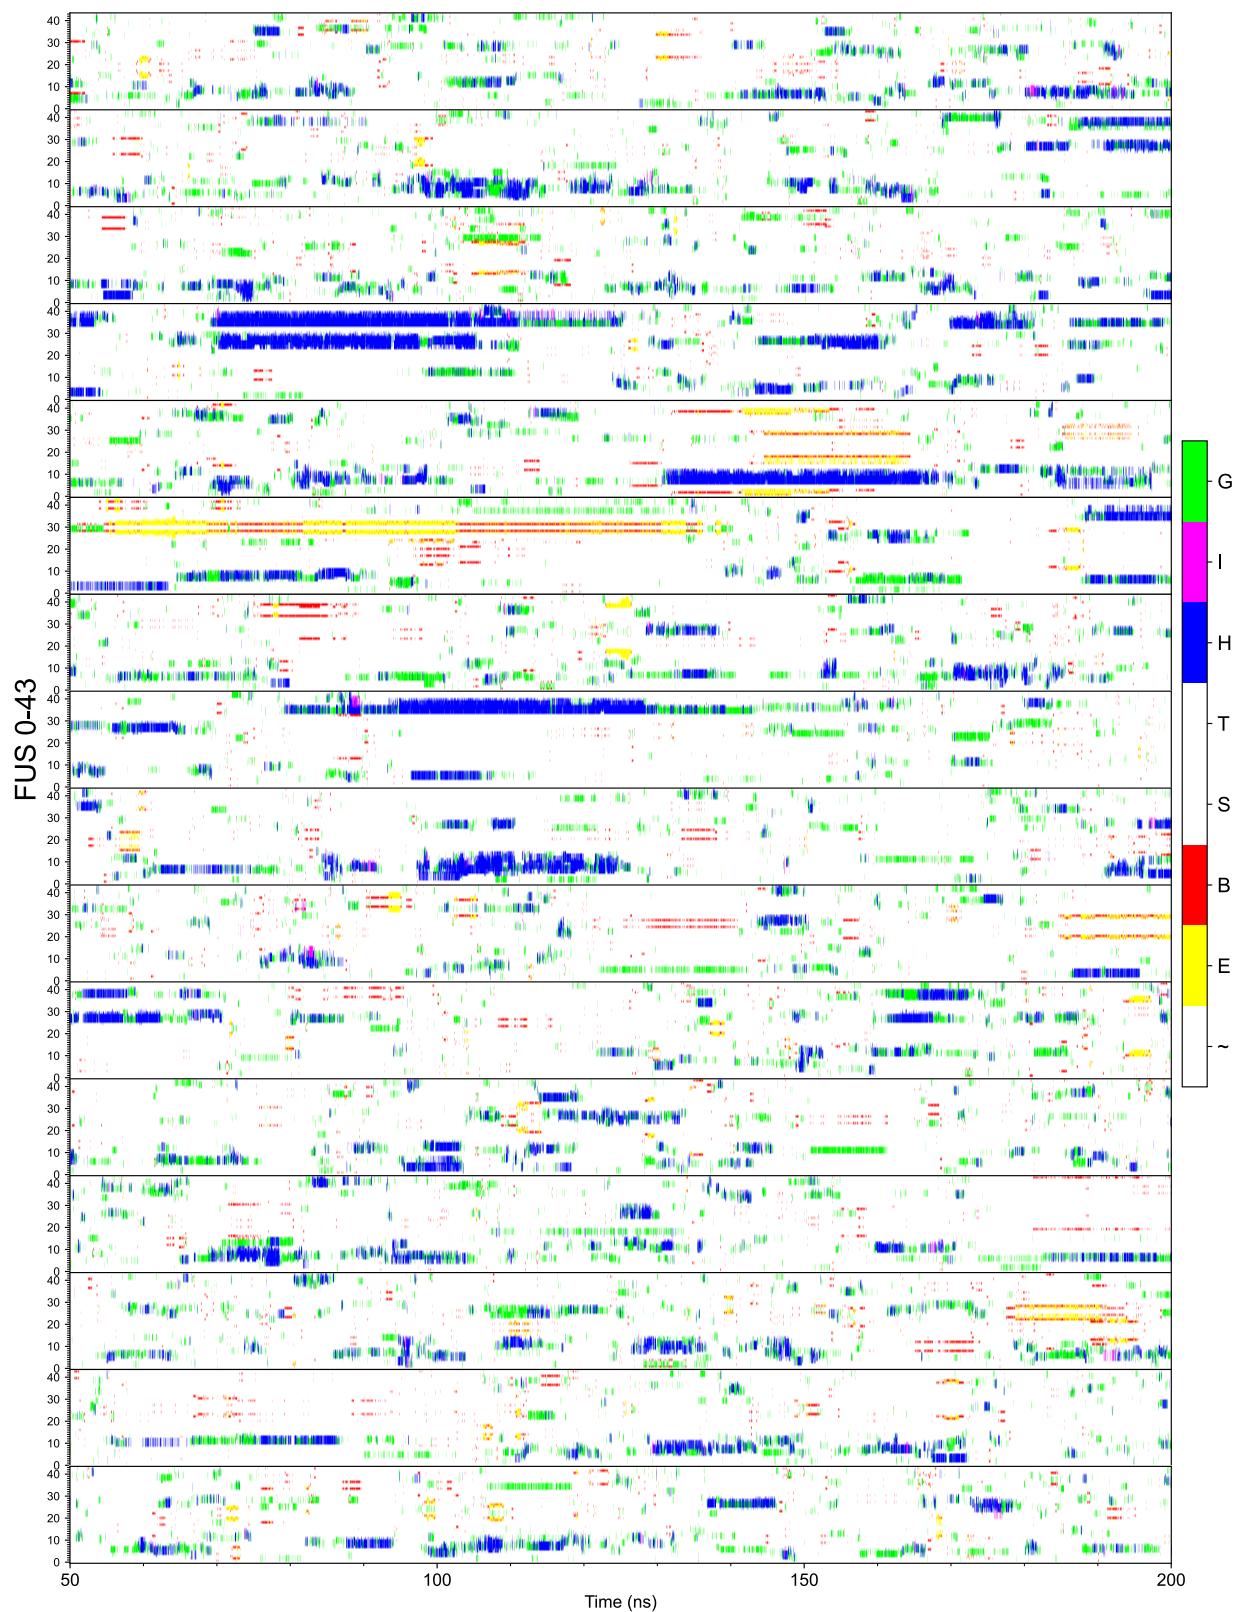

**Figure S7.** DSSP secondary structure as a function of simulation time for each demultiplexed replica moving through the temperature space of FUS<sub>0-43</sub> with ff99SBws-STQ (this study).

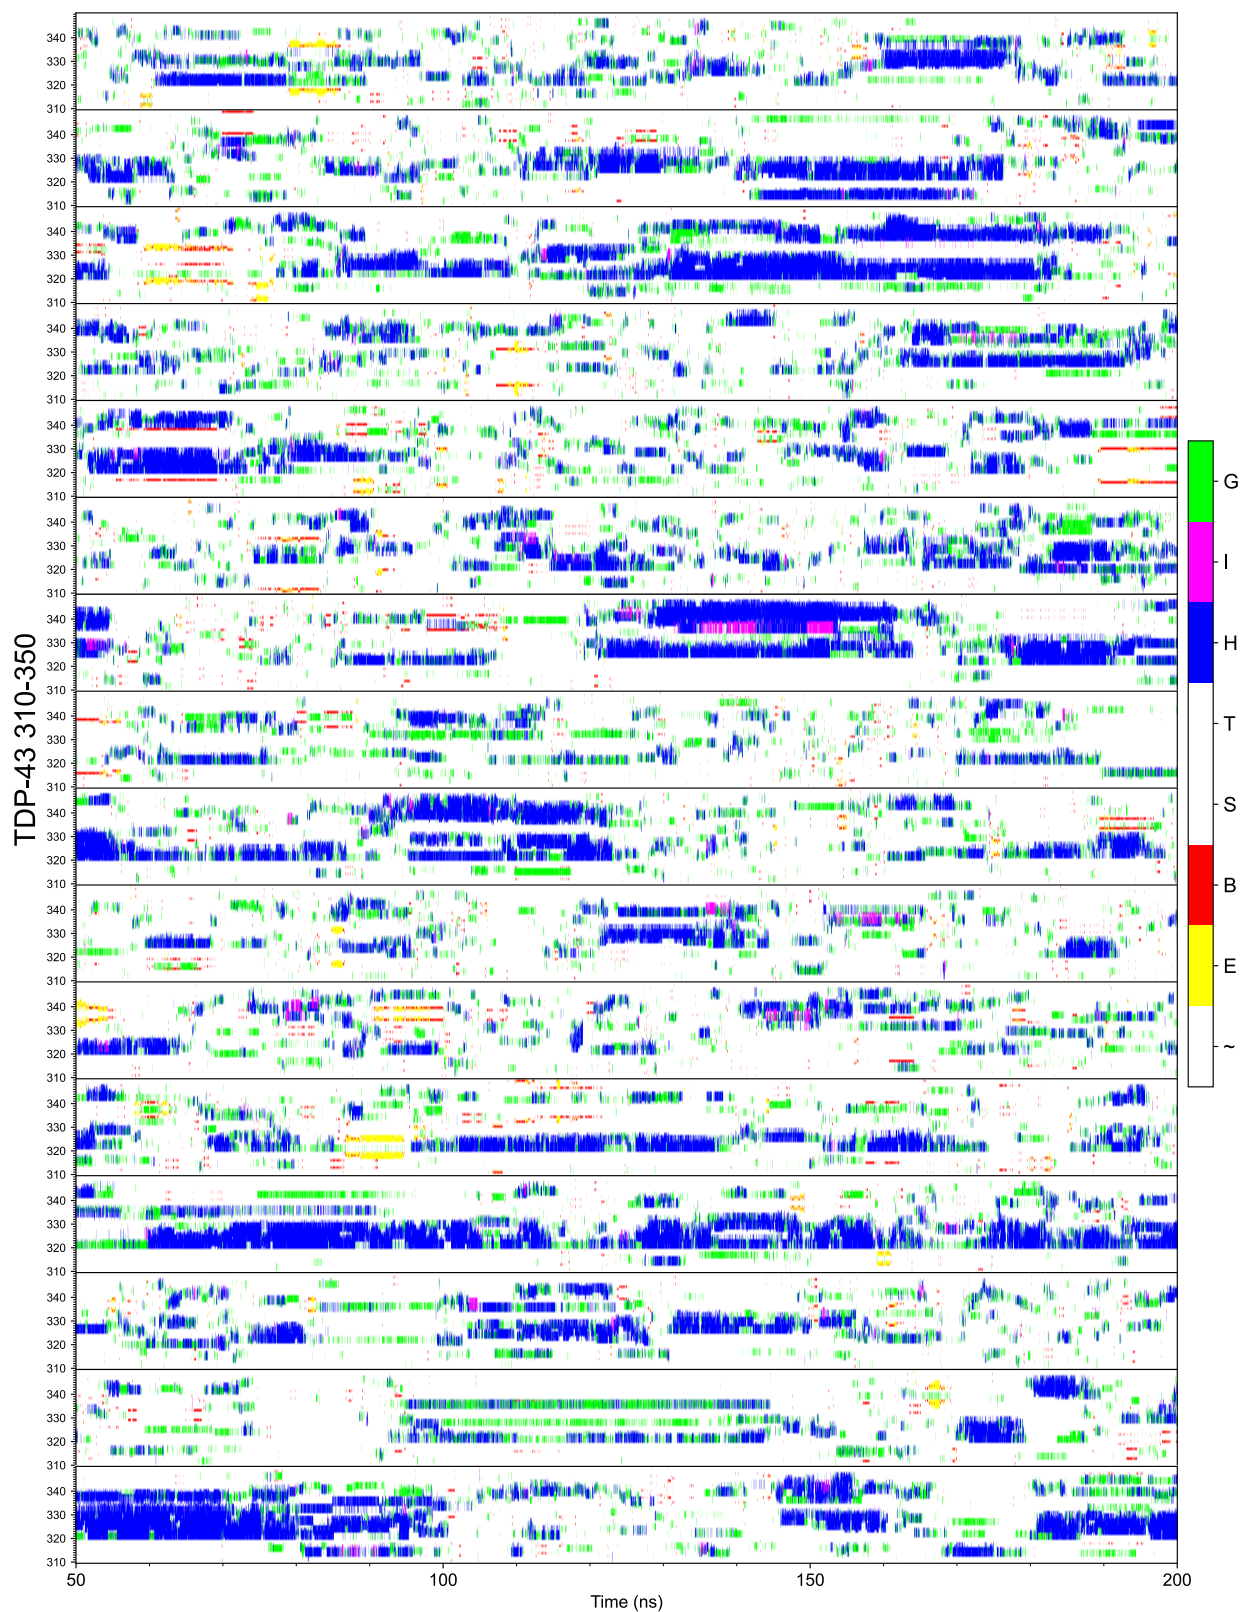

**Figure S8.** DSSP secondary structure as a function of simulation time for each demultiplexed replica moving through the temperature space of TDP-43<sub>310-350</sub> with ff99SBws-STQ (this study).

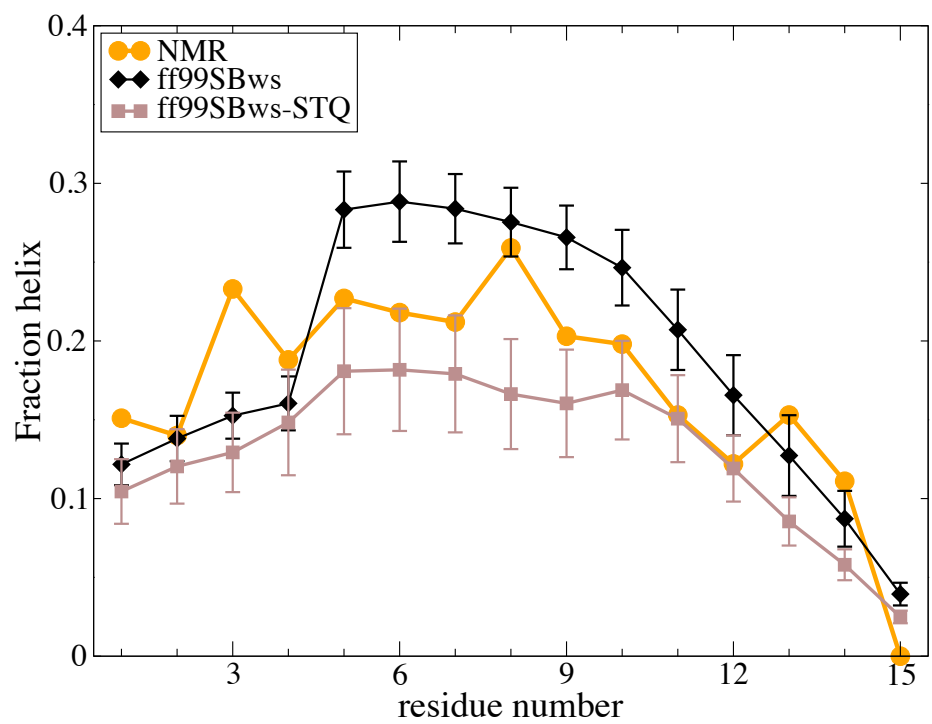

**Figure S9.** Fraction Helix of (AAQAA)<sub>3</sub> with ff99SBws and ff99SBws-STQ (this study) compared to NMR experimental data<sup>5</sup>.

## References

1. Burke, K. A., Janke, A. M., Rhine, C. L. & Fawzi, N. L. Residue-by-Residue View of In Vitro FUS Granules that Bind the C-Terminal Domain of RNA Polymerase II. *Mol. Cell* **60**, 231–241 (2015).
2. Conicella, A. E., Zerze, G. H., Mittal, J. & Fawzi, N. L. ALS Mutations Disrupt Phase Separation Mediated by  $\alpha$ -Helical Structure in the TDP-43 Low-Complexity C-Terminal Domain. *Structure* **24**, 1537–1549 (2016).
3. Janke, A. M. *et al.* Lysines in the RNA Polymerase II C-Terminal Domain Contribute to TAF15 Fibril Recruitment. *Biochemistry* **57**, 2549–2563 (2018).
4. Ryan, V. H. *et al.* Mechanistic View of hnRNPA2 Low-Complexity Domain Structure, Interactions, and Phase Separation Altered by Mutation and Arginine Methylation. *Mol. Cell* **69**, 465–479.e7 (2018).
5. Shalongo, W., Dugad, L. & Stellwagen, E. Distribution of Helicity within the Model Peptide Acetyl(AAQAA)<sub>3</sub>amide. *J. Am. Chem. Soc.* **116**, 8288–8293 (1994).
